# Supplementary material for: Mechanism of Enhancing Pyrazines in Daqu via Inoculating Bacillus licheniformis with Strains Specificity
Source: MDPI journal article supplement (doi:10.3390/foods12020304), 2023-01-09
Supplement: s1 [file s1]

Supplementary Materials for the Paper (Article)

# Mechanism of Enhancing Pyrazines in *Daqu* via Inoculating *Bacillus licheniformis* with Strains Specificity

Qiuxiang Tang <sup>1</sup>, Xiaoru Chen <sup>1</sup>, Jun Huang <sup>1</sup>, Suyi Zhang <sup>2</sup>, Hui Qin <sup>2</sup>, Yi Dong <sup>2</sup>, Chao Wang <sup>2</sup>, Xiaojun Wang <sup>2</sup>, Chongde Wu <sup>1</sup>, Yao Jin <sup>1</sup>, Rongqing Zhou <sup>1,3,\*</sup>

<sup>1</sup> College of Biomass Science and Engineering, Sichuan University, Chengdu 610065, China; Qiuxiang Tang,

<sup>2</sup> Luzhou Laojiao Company Limited, Luzhou 646000, China; Suyi Zhang,

<sup>3</sup> National Engineering Research Centre of Solid-state Brewing, Luzhou 646000, China; Rongqing Zhou,

\* Correspondence: Rongqing Zhou, zhourqing@scu.edu.cn; Tel. +86-28-85406149; (College of Biomass Science and Engineering, Sichuan University, Chengdu 610065, China)

**Table S1.** Concentration of 2, 3-butanediol (mg/kg) in strains of *B. licheniformis* J-41 and *B. licheniformis* J-49.

| Generations | J-41           | J-49           |
|-------------|----------------|----------------|
| 2           | 172.32 ± 10.12 | 176.31 ± 14.27 |
| 3           | 74.95 ± 3.40   | 143.88 ± 5.44  |
| 4           | 105.31 ± 2.13  | 164.61 ± 7.82  |
| 5           | 114.93 ± 27.48 | 246.93 ± 4.82  |
| 6           | 100.53 ± 5.23  | 168.37 ± 12.24 |
| 7           | 88.16 ± 8.55   | 112.28 ± 7.80  |
| 8           | 89.64 ± 6.55   | 120.51 ± 1.73  |

**Table S2.** Fatty acid content in cell membrane of *B. licheniformis* J-41 and *B. licheniformis* J-49.

| Fatty acid (%) | J-41         | J-49         |
|----------------|--------------|--------------|
| i-C13:0        | 0.48 ± 0.10  | 0.40 ± 0.26  |
| i-C14:0        | 38.87 ± 0.06 | 33.37 ± 0.16 |
| anteiso-C14:0  | 25.16 ± 0.18 | 28.02 ± 0.12 |
| C16:0          | 6.03 ± 0.05  | 6.25 ± 0.06  |
| anteiso-C16:0  | 12.59 ± 0.09 | 15.02 ± 0.08 |
| C16:1          | #NA          | 0.25 ± 0.05  |
| C17:0          | 15.86 ± 0.05 | 16.15 ± 0.10 |
| i-C17:0        | 1.02 ± 0.01  | 0.79 ± 0.01  |
| C18:1ω9        | #NA          | 0.19 ± 0.01  |

Note: #NA means that it is not detected.

**Citation:** Tang, Q.; Chen, X.; Huang, J.; Zhang, S.; Qin, H.; Dong, Y.; Wang, C.; Wang, X.; Wu, C.; Jin, Y.; et al. Mechanism of Enhancing Pyrazines in *Daqu* via Inoculating *Bacillus licheniformis* with Strains Specificity. *Foods* **2023**, *12*, 304. <https://doi.org/10.3390/foods12020304>

Academic Editors: Hasan Tanguler, Bulent Kabak

Received: 28 November 2022

Revised: 3 January 2023

Accepted: 4 January 2023

Published: 9 January 2023

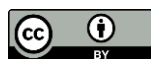

**Copyright:** © 2023 by the authors. Licensee MDPI, Basel, Switzerland. This article is an open access article distributed under the terms and conditions of the Creative Commons Attribution (CC BY) license (<https://creativecommons.org/licenses/by/4.0/>).

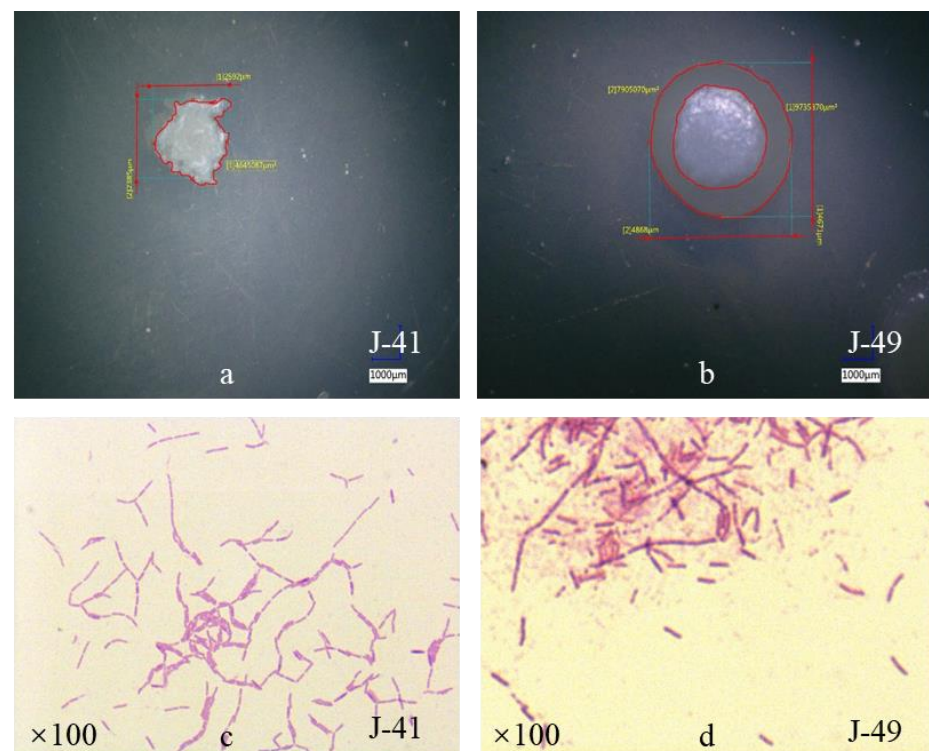

**Figure S1.** Microscopic graphs of colonies and gram staining of *B. licheniformis* J-41 and *B. licheniformis* J-49.

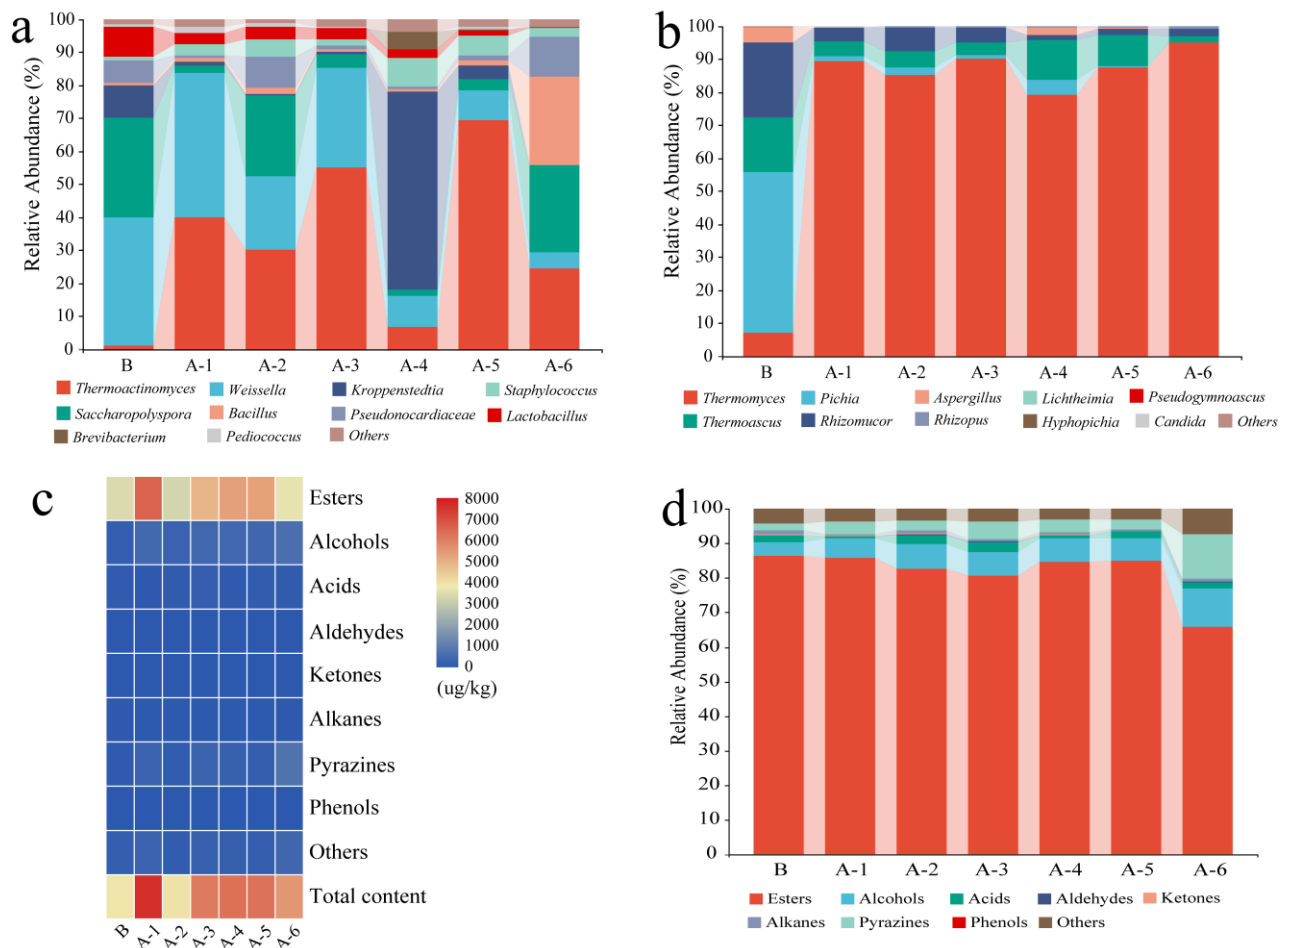

**Figure S2.** Metabolites of fortified *Daqu* using *B. licheniformis* J-41 (A-1–A-6). *Daqu* (a) bacterial and (b) fungal community composition. Volatile metabolites (c) content and (d) abundance of *Daqu*.

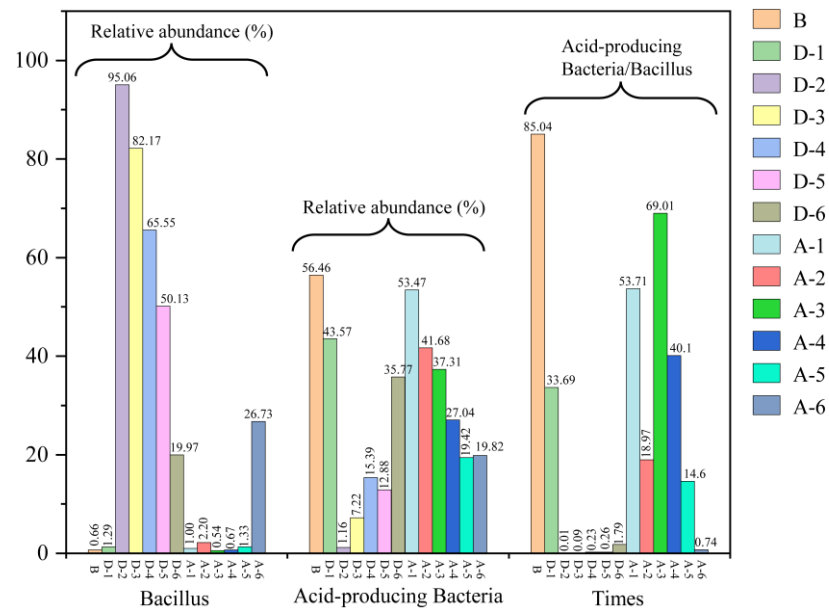

**Figure S3.** Profiles of *Bacillus* and acid-producing bacteria in *Daqu*.
